1 **Genome sequence of *Hydrangea macrophylla* and its application in analysis of the double**  
2 **flower phenotype**

3

4 **Authors**

5 Nashima K<sup>\*1</sup>, Shirasawa K<sup>\*2</sup>, Ghelfi A<sup>2</sup>, Hirakawa H<sup>2</sup>, Isobe S<sup>2</sup>, Suyama T<sup>3</sup>, Wada T<sup>3</sup>, Kurokura T<sup>4</sup>,  
6 Uemachi T<sup>5</sup>, Azuma M<sup>1</sup>, Akutsu M<sup>6</sup>, Kodama M<sup>6</sup>, Nakazawa Y<sup>6</sup>, Namai K<sup>6</sup>

7

8 1. College of Bioresource Sciences, Nihon University, Kameino 1866, Fujisawa, Kanagawa, 252-  
9 0880 Japan

10 2. Kazusa DNA Research Institute, Kazusa-Kamatari 2-6-7, Kisarazu, Chiba, 292-0813 Japan

11 3. Fukuoka Agriculture and Forestry Research Center, Yoshiki 587, Chikushino, Fukuoka, 818-8549  
12 Japan

13 4. Faculty of Agriculture, Utsunomiya University, Mine 350, Utsunomiya, Tochigi, 321-8505 Japan

14 5. School of Environmental Science, University of Shiga Prefecture, Hassakacho 2500, Hikone,  
15 Shiga, 522-0057 Japan

16 6. Tochigi Prefectural Agricultural Experimental Station, Kawarayacho 1080, Utsunomiya, Tochigi,  
17 320-0002 Japan

18

19 \*equally contributed as first author

20 Corresponding author: Nashima K

21 College of Bioresource Sciences, Nihon University, Kameino 1866, Fujisawa, Kanagawa, 252-0880  
22 Japan

23 Tel: +81-466-84-3507

24 Mail: [nashima.kenji@nihon-u.ac.jp](mailto:nashima.kenji@nihon-u.ac.jp)

25 **Abstract**

26 Owing to its high ornamental value, the double flower phenotype of hydrangea (*Hydrangea*  
27 *macrophylla*) is one of its most important traits. In this study, genome sequence information was  
28 obtained to explore effective DNA markers and the causative genes for double flower production in  
29 hydrangea. Single molecule real-time sequencing data followed by a HiC analysis was employed. The  
30 resultant haplotype-phased sequences consisted of 3,779 sequences (2.256 Gb in length and N50 of  
31 1.5 Mb), and 18 pseudomolecules comprising 1.08 Gb scaffold sequences along with a high-density  
32 SNP genetic linkage map. Using the genome sequence data obtained from two breeding populations,  
33 the SNPs linked to double flower loci ( $D_{jo}$  and  $D_{su}$ ), were discovered for each breeding population.  
34 DNA markers J01 linked to  $D_{jo}$  and S01 linked to  $D_{su}$  were developed, and these could be used  
35 successfully to distinguish the recessive double flower allele for each locus respectively. The *LEAFY*  
36 gene was suggested as the causative gene for  $D_{su}$ , since frameshift was specifically observed in double  
37 flower accession with  $d_{su}$ . The genome information obtained in this study will facilitate a wide range  
38 of genomic studies on hydrangea in the future.

39

40 **Keywords:**

41 Hydrangea, double flower, de novo genome sequencing, DNA marker

42

43

44

45

46

47

48

## 49 **1. Introduction**

50 *Hydrangea macrophylla* (Thunb.) Ser., commonly known as hydrangea, originated in Japan,  
51 and since it is the place of origin, there are rich genetic resources for this plant in Japan. Wild  
52 hydrangea accessions with superior characteristics have been bred to create attractive cultivars, and it  
53 has a long history of use as an ornamental garden plant in temperate regions. There are both decorative  
54 and non-decorative flowers in an inflorescence. Decorative flowers have large ornamental sepals that  
55 attract pollinators, whereas non-decorative flowers have inconspicuous perianths that instead play a  
56 major role in seed production<sup>1-3</sup>. In hydrangea, there are two types of decorative flower phenotype:  
57 single flower and double flower. Single flowers generally have four petaloid sepals per decorative  
58 flower, while this number in double flowers is approximately fourteen. Double flowers do not have  
59 stamens or petals<sup>4</sup>. Therefore, petals and stamens would be converted to petaloid sepals since number  
60 of petaloid sepals are increased and stamens and petals are lost. Because of their high ornamental value,  
61 producing double flower is an important breeding target in hydrangea cultivation.

62 To obtain double flower progenies, the double flower cultivars ‘Sumidanohanabi’ (Figure  
63 1A) and ‘Jogasaki’ (Figure 1B) were crossbred in Japan<sup>4</sup>. Previous studies have suggested that double  
64 flower phenotype is a recessive characteristic controlled by a single major gene<sup>4,5</sup>. Suyama et al.<sup>4</sup>  
65 found that crosses between the progeny of ‘Sumidanohanabi’ and the progeny of ‘Jogasaki’ produced  
66 only single flower descendants. Thus, it was also suggested that genes controlling the double flower  
67 phenotype are different<sup>4</sup>. While Suyama et al.<sup>4</sup> suggested that a single locus with different double  
68 flower alleles controls the phenotype, Waki et al.<sup>5</sup> speculated that two different loci control double  
69 flower production individually. Therefore, it is not clear whether a single locus or two loci control the  
70 phenotype. We term the double flower locus  $D_{su}$  as the locus controlling the double flower phenotype  
71 of ‘Sumidanohanabi’ and the double flower locus  $D_{jo}$  as the locus controlling the double flower  
72 phenotype of ‘Jogasaki.’ Waki et al.<sup>5</sup> identified  $D_{su}$  on the genetic linkage map. They also found that

73 the DNA marker STAB045 was the nearest marker to  $D_{su}$ , and that STAB045 could help in  
74 distinguishing flower phenotype with a 98.6% fitting ratio<sup>5</sup>. Contrarily,  $D_{jo}$  has not been identified,  
75 and the DNA marker linked to  $D_{jo}$  has not been developed. It is still not known whether  $D_{jo}$  and  $D_{su}$   
76 are at the same loci.

77 The mechanisms and genes controlling double flower phenotype in hydrangea have not been  
78 clarified. Waki et al.<sup>5</sup> hypothesized that the mutation of C-class genes could be associated with the  
79 double flower phenotype of ‘Sumidanohanabi’, since the C-class gene mutant of *Arabidopsis thaliana*  
80 and C-class gene-repressed petunias produce double flowers<sup>6</sup>. However, the double flower phenotype  
81 of hydrangea is morphologically different from that of *A. thaliana* and petunia—petals and stamens  
82 would be converted to petaloid sepals, while stamens converted to petals in *A. thaliana* and petunia.  
83 This suggests that the genes controlling double flower production in hydrangea are different from  
84 corresponding genes in other plant species. Identification of the genes controlling double flower  
85 production in hydrangea could reveal novel regulatory mechanisms of flower development.

86 Genomic information is essential for DNA marker development and identification of genes  
87 controlling specific phenotypes. However, no reference genome sequence is publicly available for  
88 hydrangea so far. Although a genome assembly of hydrangea (1.6 Gb) using only short-read data has  
89 been reported<sup>7</sup>, the resultant assembly is so fragmented that it comprises 1,519,429 contigs with an  
90 N50 size of 2,447 bp and has not been disclosed. Improved, advanced long-read technologies and  
91 bioinformatics methods would make it possible to determine the sequences of complex genomes. An  
92 assembly strategy for single molecule real-time sequencing data followed by a HiC analysis has been  
93 developed to generate haplotype-phased sequences in heterozygous regions of diploid genomes<sup>8</sup>.  
94 Genome sequences at the chromosome level could be obtained with a HiC clustering analysis<sup>9</sup> as well  
95 as with a genetic linkage analysis<sup>10</sup>. Such genomic sequence will provide basic information to identify  
96 genes and DNA markers of interest, and to discover allelic sequence variations. In this study, we

97 constructed the genomic DNA sequence, obtained SNPs information, and performed gene prediction.  
98 We also developed DNA markers linked to  $D_{jo}$  using SNP information obtained by double digest  
99 restriction site associated DNA sequence (ddRAD-Seq) analysis of breeding population 12GM1,  
100 which segregated double flower phenotypes of  $D_{jo}$ . In addition, we attempted to identify the causative  
101 genes for  $D_{jo}$  and  $D_{su}$ .

102

## 103 **2. Materials and Methods**

### 104 **2.1. De novo assembly of the hydrangea genome**

105 For genomic DNA sequencing, *H. macrophylla* 'Aogashima-1,' collected from Aogashima  
106 island of the Izu Islands in Tokyo Prefecture, Japan, was used. Genomic DNA was extracted from the  
107 young leaves with Genomic-Tip (Qiagen, Hilden, Germany). First, we constructed a sequencing  
108 library (insert size of 500 bp) with TruSeq DNA PCR-Free Library Prep Kit (Illumina, San Diego, CA,  
109 USA) to sequence on HiSeqX (Illumina). The size of the 'Aogashima-1' genome was estimated using  
110 Jellyfish v2.1.4<sup>11</sup>. After removing adapter sequences and trimming low-quality reads, high-quality  
111 reads were assembled using Platanus<sup>12</sup>. The resultant sequences were designated HMA\_r0.1.  
112 Completeness of the assembly was assessed with sets of BUSCO v.1.1b<sup>13</sup>.

113 Next, a SMRT library was constructed with SMRTbell Express Template Prep Kit 2.0  
114 (PacBio, Menlo Park, CA, USA) in accordance with the manufacture's protocol and sequenced with  
115 SMRT Cell v2.1 on a Sequel System (PacBio). The sequence reads were assembled using FALCON  
116 v.1.8.8<sup>14</sup> to generate primary contig sequences and to associate contigs representing alternative alleles.  
117 Haplotype - resolved assemblies (i.e. haplotigs) were generated using FALCON-Unzip v.1.8.8<sup>14</sup>.  
118 Potential sequence errors in the contigs were corrected twice with ARROW v.2.2.1 implemented in  
119 SMRT Link v.5.0 (PacBio) followed by one polishing with Pilon<sup>15</sup>. Subsequently, a HiC library was  
120 constructed with Proximo Hi-C (Plant) Kit (Phase Genomics, Seattle, WA, USA) and sequenced on

121 HiSeqX (Illumina). After removing adapter sequences and trimming low-quality reads, high-quality  
122 HiC reads were used to generate two haplotype-phased sequences from the primary contigs and  
123 haplotig sequences with FALCON-Phase<sup>8</sup>.

124 To validate the accuracy of the sequences, we developed a genetic map based on SNPs,  
125 which were from a ddRAD-Seq analysis on an F2 mapping population (n = 147), namely 12GM1,  
126 maintained at the Fukuoka Agriculture and Forestry Research Center, Japan. The 12GM1 population  
127 was generated from a cross between ‘Posy Bouquet Grace’ (Figure 1C) and ‘Blue Picotee Manaslu’  
128 (Figure 1D). Genomic DNA was extracted from the leaves with DNeasy Plant Mini Kit (Qiagen). A  
129 ddRAD-Seq library was constructed as described in Shirasawa et al.<sup>16</sup> and sequenced with HiSeq4000.  
130 Sequence reads were processed as described by Shirasawa et al.<sup>16</sup> and mapped on the HMA\_r1.2 as a  
131 reference. From the mapping alignment, high-confidence biallelic SNPs were obtained with the  
132 following filtering options: --minDP 5 --minQ 10 --max-missing 0.5. The genetic map was constructed  
133 with Lep-Map3<sup>17</sup>.

134 Potential mis-jointed points in the phase 0 and 1 sequences of HMA\_r1.2 were cut and re-  
135 joined, based on the marker order in the genetic map, for which we employed ALLMAPS<sup>18</sup>. The  
136 resultant sequences were named HMA\_r1.3.pmol, as two haplotype-phased pseudomolecule  
137 sequences of the ‘Aogashima-1’ genome. Sequences that were unassigned to the genetic map were  
138 connected and termed chromosome 0.

139

## 140 **2.2 Gene prediction**

141 For gene prediction, we performed Iso-Seq analysis. Total RNA was extracted from 12  
142 samples of ‘Aogashima-1’: flower buds (2 stages); decorative flowers (2 stages); colored and colorless  
143 non-decorative flowers; fruits; shoots; roots; buds, and one-day light-intercepted leaves and buds. In  
144 addition, the 29 samples listed in Supplementary Table S1 were included. Iso-Seq libraries were

145 prepared with the manufacture's Iso-Seq Express Template Preparation protocol, and sequenced on a  
146 Sequel System (PacBio). The raw reads obtained were treated with ISO-Seq3 pipeline, implemented  
147 in SMRT Link v.5.0 (PacBio) to generate full-length, high-quality consensus isoforms. In parallel,  
148 RNA-Seq data was also obtained from the 16 samples listed in Supplementary Table S1. Total RNA  
149 extracted from the samples was converted into cDNA and sequenced on HiSeq2000, Hiseq2500  
150 (Illumina), and NovaSeq6000 (Illumina). The Iso-Seq isoform sequences and the RNA-Seq short-  
151 reads were employed for gene prediction.

152 To identify putative protein-encoding genes in the genome assemblies, *ab-initio*-, evidence-,  
153 and homology-based gene prediction methods were used. For this prediction, unigene sets generated  
154 from 1) the Iso-Seq isoforms; 2) de novo assembly of the RNA-Seq short-reads with Trinity-v2.4.0<sup>19</sup>;  
155 3) peptide sequences predicted from the genomes of *Arabidopsis thaliana*, *Arachis hypogaea*,  
156 *Cannabis sativa*, *Capsicum annuum*, *Cucumis sativus*, *Populus trichocarpa*, and *Quercus lobata*; and  
157 4) *ab-initio* genes, were predicted with Augustus-v3.3.1<sup>20</sup>. The unigene sequences were aligned onto  
158 the genome assembly with BLAT<sup>21</sup> and genome positions of the genes were listed in general feature  
159 format version 3 with blat2gff.pl (<https://github.com/vikas0633/perl/blob/master/blat2gff.pl>). Gene  
160 annotation was performed with Hayai-annotation Plants<sup>22</sup>. Completeness of the gene prediction was  
161 assessed with sets of BUSCO v4.0.6<sup>13</sup>.

162

### 163 **2.3 Detection of SNPs linked to the double flower phenotype**

164 For identification of SNPs linked to double flower loci  $D_{jo}$  and  $D_{su}$ , ddRAD-Seq data  
165 analysis was performed. ddRAD-Seq data of the 12GM1 population described above was used to  
166 identify  $D_{jo}$ . For identification of SNPs linked to double flower locus  $D_{su}$ , KF population<sup>5</sup>—93 F2  
167 specimens of 'Kirakiraboshi' (Figure 1E) and 'Frau Yoshimi' (Figure 1F)—were used for ddRAD-Seq  
168 analysis. The KF population was maintained at Tochigi Prefectural Agricultural Experimental Station,

169 Japan. ddRAD-Seq analysis of the KF population was performed using the same method used for the  
170 12GM1 population.

171 ddRAD-Seq data of the 12GM1 and KF populations were processed as follows: Low-quality  
172 sequences were removed and adapters were trimmed using Trimmomatic-0.36<sup>23</sup> (LEADING:10,  
173 TRAILING:10, SLIDINGWINDOW:4:15, MINLEN:51). BWA-MEM (version 0.7.15-r1140) was  
174 used for mapping onto genome sequence. The resultant sequence alignment/map format (SAM) files  
175 were converted to binary sequence alignment/map format files and subjected to SNP calling using the  
176 mpileup option of SAMtools<sup>24</sup> (version 1.4.1) and the view option of BCFtools (parameter -vcg). If  
177 the DP of called SNP in individuals was under 5%, the genotype was treated as missing. SNPs with  
178 5% or more of missing genotype were filtered out. Each SNP was evaluated, fitting ratios with the  
179 flower phenotype.

180

#### 181 **2.4 DNA marker development and analysis for *D<sub>jo</sub>***

182 A CAPS marker was designed based on SNP (Scaffold:0008F-2, position: 780104) that was  
183 completely linked to the double flower locus *D<sub>jo</sub>*. Primers were designed using Primer3<sup>25</sup> under  
184 conditions with product size ranging from 150 to 350 bp, primer size from 18 to 27 bp, and primer  
185 TM from 57 to 63°C. Primer sequences of the designed CAPS marker named J01 were: Forward: 5'-  
186 CTGGCAGATTCTCCTGAC-3' and Reverse: 5'-TATTCCTTGGGAGGCTCT-3'. PCR assays  
187 were done in a total volume of 10  $\mu$ L, containing 5  $\mu$ L of GoTaq Master Mix (Promega, Madison, WI,  
188 USA), 1 mM each of forward and reverse primer, and 5 ng of template DNA. The PCR conditions  
189 were 94°C for 2 min, 35 cycles of denaturation at 94°C for 1 min, annealing at 55°C for 1 min, and  
190 extension at 72°C for 1 min; and a final extension step at 72°C for 3 min. Then, restriction enzyme  
191 assay was done in a total volume of 10  $\mu$ L, containing 5  $\mu$ L of PCR product, ten units of restriction  
192 enzyme TaqI (New England Biolabs, Ipswich, MA, USA), and 1  $\mu$ L of cut smart buffer. Restriction



193 enzyme assay was performed at 65°C for 3 h. The restriction assay product was stained with 1x  
194 GRRED (Biocraft, Tokyo, Japan) and separated in 1.5% (w/v) agarose gel in TAE buffer. Designed  
195 CAPS marker J01 was applied to the 12GM1 population, 14GT77 population (64 F2 specimens of  
196 ‘Posy Bouquet Grace’ × ‘Chibori’) and the 15J1P1 population (98 F1 specimens of ‘Izunohana’ ×  
197 03J1P1) that segregate the double flower locus  $D_{jo}$ .

198

## 199 **2.5 Resequencing and comparison of LEAFY gene sequence and DNA marker development**

200 To compare sequences, resequencing of genomic DNA was performed for accessions of  
201 ‘Kirakiraboshi,’ ‘Frau Yoshimi,’ ‘Posy Bouquet Grace,’ and ‘Blue Picotee Manaslu.’ Sequencing  
202 libraries (insert size of 500 bp) for the four lines were constructed with TruSeq DNA PCR-Free Library  
203 Prep Kit (Illumina) to sequence on a HiSeqX (Illumina). From the sequence reads obtained, low-  
204 quality bases were deleted with PRINSEQ v.0.20.4<sup>26</sup> and adaptor sequences were trimmed with fastx  
205 clipper (parameter, -a AGATCGGAAGAGC) in FASTX-Toolkit v.0.0.13  
206 ([http://hannonlab.cshl.edu/fastx\\_toolkit](http://hannonlab.cshl.edu/fastx_toolkit)). High-quality reads were aligned on the HMA\_r1.2 with  
207 Bowtie2<sup>27</sup> v.2.2.3 to detect sequence variant candidates by with the mpileup command in SAMtools  
208 v.0.1.19<sup>24</sup>. High-confidence variants were selected using VCFtools<sup>29</sup> v.0.1.12b with parameters of --  
209 minDP 10, --maxDP 100, --minQ 999, --max-missing 1.

210 For comparison of *LEAFY* (*LFY*) sequence in ‘Kirakiraboshi,’ ‘Frau Yoshimi,’ ‘Posy  
211 Bouquet Grace,’ and ‘Blue Picotee Manaslu,’ BLAST analysis using genomic sequence of *LFY*  
212 (Scaffold 0577F, position 678200-684639) as query, and genomic DNA sequence of each cultivar as  
213 database, was performed to confirm detected sequence variants. These data analyses were performed  
214 using CLC main workbench (Qiagen). INDEL marker S01 that amplifies the second intron of *LFY*,  
215 was designed by visual inspection (Forward: 5'-CATCATTAATAGTGGTGACAG-3', Reverse: 5'-  
216 CACACATGAATTAGTAGCTC-3'). The PCR conditions were 94°C for 2 min, 35 cycles of

217 denaturation at 94°C for 1 min, annealing at 55°C for 1 min, extension at 72°C for 1 min; and a final  
218 extension step at 72°C for 3 min. The PCR product was stained with 1x GRRED (Biocraft) and  
219 separated in 2.5% (w/v) agarose gel in TAE buffer.

220

## 221 **2.6 Cloning and sequence determination of *LFY* gene of ‘Kirakiraboshi’ and ‘Frau Yoshimi’**

222 Total RNA was isolated from the flower buds of ‘Kirakiraboshi,’ and ‘Frau Yoshimi’ using RNAiso  
223 Plus (TaKaRa, Japan), and reverse transcribed using PrimeScript II 1st strand cDNA Synthesis Kit  
224 (TaKaRa, Japan). The sequence of the *LFY* gene was amplified by PCR in 50- $\mu$ L reaction mixture by  
225 using TaKaRa Ex Taq Hot Start Version (TaKaRa Bio, Shiga, Japan) and the *LFY* specific primer  
226 (Forward: 5'-ATGGCTCCACTACCTCCACC-3' and Reverse: 5'-CTAACACCCTCTAAAAGCAG-  
227 3'). These PCR products were purified, and inserted into a pMD20-T vector using the Mighty TA-  
228 cloning kit (TaKaRa Bio). The sequence of *LFY* coding sequence (CDS) in pMD20-T vector was  
229 analyzed by 3130xl DNA sequencer (Applied Biosystems, Foster City, CA, USA). Sequence  
230 alignments were obtained by using CLC main workbench (Qiagen).

231

## 232 **2.7 DNA marker assessment across hydrangea accessions**

233 For assessment of DNA markers for the double flower phenotype, 35 *H. macrophylla*  
234 accessions were used. Genotyping for J01 was performed as described above. Genotyping for S01 was  
235 performed by fragment analysis as follows. PCR amplification was performed in a 10- $\mu$ L reaction  
236 mixture containing 5  $\mu$ L of GoTaq Master Mix (Promega), 5 pmol FAM-labeled universal primer (5'  
237 - FAM-gctacggactgacctcggac -3' ), 2.5 pmol forward primer with universal adapter sequence (5' -  
238 gctacggactgacctcggacCATCATTAATAGTGGTGACAG -3' ), 5 pmol reverse primer, and 5 ng of  
239 template DNA. DNA was amplified in 35 cycles of 94°C for 1 min, 55°C for 1 min, and 72°C for 2  
240 min; and a final extension of 5 min at 72°C. The amplified PCR products were separated and detected

241 in a PRISM 3130xl DNA sequencer (Applied Biosystems, USA). The sizes of the amplified bands  
242 were scored against internal-standard DNA (400HD-ROX, Applied Biosystems, USA) by  
243 GeneMapper software (Applied Biosystems, USA).

244

### 245 **3. Results and Discussion**

#### 246 **3.1 Draft genome assembly with long-read and HiC technologies**

247 The size of the hydrangea genome was estimated by k-mer-distribution analysis with the short-read of  
248 132.3 Gb data. The resultant distribution pattern indicated two peaks, representing homozygous (left  
249 peak) and heterozygous (right peak) genomes, respectively (Figure 2). The haploid genome of  
250 hydrangea was estimated to be 2.2 Gb in size. The short reads were assembled into 612,846 scaffold  
251 sequences. The total length of the resultant scaffolds, i.e. HMA\_r0.1, was 1.7 Gb with an N50 length  
252 of 9.1 kb (Supplementary Table S2). Only 72.2% of complete single copy orthologues in plant  
253 genomes were identified in a BUSCO analysis (Supplementary Table S2).

254 Next, we employed long sequence technology to extend the sequence contiguity and to  
255 improve the genome coverage. A total of 106.9 Gb of reads (49.4×) with an N50 read length of 28.8  
256 kb was obtained from 14 SMRT Cells. The long-reads were assembled, followed by sequence error  
257 corrections into 15,791 contigs consisting of 3,779 primary contigs (2.178 Gb in length and N50 of  
258 1.4 Mb), and 12,012 haplotig sequences (1.436 Gb in length and N50 of 184 kb). To obtain two  
259 haplotype-phased complete-length sequences, 697 M reads of HiC data (105.3 Gb) were obtained and  
260 subjected to FALCON-Phase. The resultant haplotype-phased sequences consisted of 3,779 sequences  
261 (2.256 Gb in length and N50 of 1.5 Mb) for “phase 0,” and 3,779 sequences (2.227 Gb in length, and  
262 N50 of 1.4 Mb) for “phase 1.”

263

### 264 **3.2 Pseudomolecule sequences based on genetic mapping**

265 To detect potential errors in the assembly and to assign the contig sequences onto the hydrangea  
266 chromosomes, we established an F2 genetic map based on SNPs derived from a ddRAD-Seq  
267 technology. Approximately 1.8 million high-quality ddRAD-Seq reads per sample were obtained from  
268 the mapping population and mapped to either of the two phased sequences with alignment rates of  
269 88.4% and 88.7%, respectively. A set of SNPs detected from the alignments were classified into 18  
270 groups and ordered to construct two genetic maps for the two phased sequences (2,849.3 cM in length  
271 with 3,980 SNPs, and 2,944.5 cM in length with 4,071 SNPs). The nomenclature of the linkage groups  
272 was named in accordance with the previous genetic map based on SSRs<sup>5</sup>. The phased sequences were  
273 aligned on each genetic map to establish haplotype-phased, chromosome-level pseudomolecule  
274 sequences. During this process, one contig was cut due to possible mis-assembly. The resultant  
275 sequences for phase 0 had 730 contigs with a total length of 1,078 Mb and the other for phase 1 had  
276 743 contigs spanning 1,076 Mb.

277

### 278 **3.3. Transcriptome analysis followed by gene prediction**

279 In the Iso-Seq analysis, Circular Consensus Sequence (CCS) reads were generated from the raw  
280 sequence reads. The CCS reads were classified in full-length and non-full length reads and the full-  
281 length reads were clustered to produce consensus isoforms. In total, 116,634 high-quality isoforms  
282 were used for gene prediction. In the RNA-Seq analysis, on the contrary, a total of 80.7 Gb reads were  
283 obtained and assembled into 12,265 unigenes. The high-quality isoforms and unigenes together with  
284 gene sequences predicted from the *Arabidopsis thaliana*, *Arachis hypogaea*, *Cannabis sativa*,  
285 *Capsicum annuum*, *Cucumis sativus*, *Populus trichocarpa*, and *Quercus lobate* genomes were aligned  
286 onto the assembly sequence of the hydrangea genome. By adding ab-initio on genes, 32,205 and  
287 32,222 putative protein-encoding genes were predicted from the phase 0 and phase 1 sequences,

288 respectively. This gene set included 91.4% complete BUSCOs. Out of the 10,108 genes, 16,725, and  
289 21,985 were assigned to Gene Ontology slim terms in the biological process, cellular component, and  
290 molecular function categories, respectively. Furthermore, 4,271 genes had assigned enzyme  
291 commission numbers.

292

### 293 **3.4 Identification of SNPs tightly linked to double flower phenotype**

294 To identify SNPs tightly linked to the double flower phenotype of ‘Jogasaki,’ ddRAD-Seq  
295 analysis was performed on the 12GM1 population, which segregates the double flower phenotype of  
296 ‘Jogasaki.’ As a result, 14,006 of SNPs were called by ddRAD-Seq analysis of the 12GM1 population.  
297 In this population, the double flower phenotype was expected when the plant was homozygous for the  
298 ‘Posy Bouquet Grace’ genotype, and the single flower phenotype was expected when the plant was  
299 homozygous for ‘Blue Picotee Manaslu’ or was heterozygous. Each SNP was tested for its fitting rate  
300 to this model. As a result, ten SNPs were found to have more than a 95% fitting rate, and six SNPs  
301 were completely co-segregated with flower phenotype (Table 1).

302 CAPS marker J01 was developed based on SNP at scaffold 0008F-2\_780104. J01 CAPS  
303 marker amplified 167 bp of fragment by PCR, and digestion with Taq I restriction enzyme generated  
304 50 bp and 117 bp fragments in the double flower allele (Figure 3). J01 marker was fitted with flower  
305 phenotype at 99.3% in the 15IJP1 and 14GT77 populations, which segregated the double flower  
306 phenotype of ‘Jogasaki’ (Supplementary Table S3, S4). This indicated that J01 marker was tightly  
307 linked to the  $D_{jo}$  locus. Thus,  $D_{jo}$  is suggested to be located adjacent to J01, which is located at position  
308 46,326,384 in CHR17, (Figure 4).

309 For identification of SNPs linked to the double flower phenotype of ‘Sumidanohanabi,’ the  
310 KF population that segregates the double flower phenotype derived from ‘Sumidanohanabi’ were used.  
311 First, we tried to find co-segregated scaffolds with the double flower phenotype by ddRAD-Seq

312 analysis of the KF population. As a result of ddRAD-Seq analysis, 15,102 of SNPs were called. In this  
313 population, the double flower phenotype was expected when the plant was homozygous for the  
314 ‘Kirakiraboshi’ genotype, and the single flower phenotype was expected when the plant was  
315 homozygous for ‘Frau Yoshimi’ or was heterozygous. Each SNP was tested for its fitting rate to this  
316 model. As a result, five SNPs on three scaffolds were found to have more than a 95% fitting rate with  
317 the model (Table 2). Since SNPs on scaffold 3145F all had the same genotype across the KF population,  
318 three loci—on scaffold 0577F, 3145F, 0109F—were detected. According to genotypes of the KF  
319 population, these three loci were tightly linked within 5 cM; 0109F (0 cM) - 3145F (3.9 cM) - 0577F  
320 (5.0 cM). Since the SNP at position 868569 in 0109F was found at the position 57,436,162 in CHR04,  
321 locus  $D_{su}$ , which controls the double flower phenotype of ‘Sumidanohanabi,’ was suggested to be  
322 located on terminal of CHR04 (Figure 4).

323

### 324 **3.5 Prediction of genes controlling double flower**

325 To find the gene controlling  $D_{su}$  and  $D_{jo}$ , we searched the homeotic genes on scaffolds shown  
326 in Table 1 and Table 2. We did not find any notable homeotic gene controlling flower phenotype for  
327  $D_{jo}$ . For  $D_{su}$ , the g182220 gene, which encoded a homeotic gene  $LFY$ , was found on scaffold 0577F.  
328 To investigate the possibility that it was the causative gene for  $D_{su}$ , sequence variants on  $LFY$  genomic  
329 sequence were searched to identify ‘Kirakiraboshi’ specific mutation, using resequencing data of  
330 ‘Kirakiraboshi,’ ‘Frau Yoshimi,’ ‘Posy Bouquet Grace,’ and ‘Blue Picotee Manaslu.’ As a result, five  
331 INDELS and six sequence variants were found as ‘Kirakiraboshi’ specific mutations (Figure 5).

332 Cloning and sequencing of  $LFY$  CDS was performed on ‘Kirakiraboshi’ and ‘Frau Yoshimi.’  
333 From ‘Frau Yoshimi,’ a single CDS comprising three exons was obtained. From ‘Kirakiraboshi,’ two  
334 CDSs with splice variants were obtained. While splicing 1 CDS resulted in three exons, splicing 2  
335 CDS resulted in only two exons, corresponding to the first and third splice products of splicing 1 CDS

336 (Supplementary Figure S1). The deduced amino acid sequences were aligned using CDSs of ‘Frau  
337 Yoshimi’ and ‘Kirakiraboshi,’ g182220 sequence, protein LFY of *Arabidopsis thaliana*, and protein  
338 FLO of *Antirrhinum majos*. While the deduced amino acid sequences of ‘Frau Yoshimi’ and g182220  
339 showed sequence similarity in the entire region, frameshift occurred in the two CDSs obtained from  
340 ‘Kirakiraboshi’ and the resulting products had no sequence similarity across the latter half (Figure 6).  
341 Frameshift observed in splicing 1 CDS was due to one bp of DNA insertion in the second exon, at  
342 position 1,931 (Figure N3A). On the contrary, frameshift observed in splicing 2 CDS was due to the  
343 complete loss of the second exon (Figure 6).

344 To develop a DNA marker for distinguishing the  $d_{su}$  allele from the  $D_{su}$  alleles in the *LFY*  
345 genomic sequence, we focused and designed a DNA marker on ‘Kirakiraboshi’ specific 14 bp deletion  
346 at position 3,617 from initiation codon (Figure 5). We developed INDEL S01 marker amplified 236  
347 bp fragment for the double flower allele of ‘Kirakiraboshi,’ and 250 bp and 280 bp fragments for the  
348 single flower allele of ‘Frau Yoshimi’ (Figure 7A). Three types of alleles resulted from the presence  
349 or absence of a 30 bp deletion at position 3,482 in addition to the 14 bp INDEL. These were both 30  
350 bp and 14 bp deletions on the 236 bp allele, 30 bp deletion on the 250 bp allele, and no deletion on the  
351 280 bp allele (Figure 7B).

352

### 353 **3.6 Genotyping of hydrangea accessions using J01 and S01 markers**

354 Since the J01 marker could distinguish  $D_{jo}/d_{jo}$  alleles and the S01 marker could distinguish  
355  $D_{su}/d_{su}$  alleles, a combined use of J01 and S01 DNA markers was expected to reveal the origin of the  
356 double flower phenotype,  $d_{jo}$  or  $d_{su}$ , in various accessions. Therefore, DNA marker genotyping on *H.*  
357 *macrophylla* accessions were performed using two DNA markers, J01 and S01. All tested double  
358 flower accessions showed homozygous genotypes of J01 or S01; ten of the double flower accessions  
359 were homozygous of 117\_50 in J01, and four were homozygous of 236 in S01 (Table 3). Contrarily,

360 all single flower accessions showed other genotypes.

361 Previously, the double flower phenotype has been revealed to be controlled by a single locus  
362 with the inheritance of single flower dominant and double flower recessive genes<sup>4,5</sup>. It was also  
363 suggested that genes controlling the double flower phenotype were different between ‘Jogasaki’ and  
364 ‘Sumidanohanabi’ based on confirmation of the segregation ratio of crossed progenies<sup>4</sup>. Our study  
365 revealed that the double flower phenotype of ‘Jogasaki’ was controlled by a single  $D_{jo}$  locus on CHR17,  
366 and the double flower phenotype of ‘Sumidanohanabi’ was controlled by a single  $D_{su}$  locus on CHR04.  
367 In addition, all double flower accessions showed homozygosity for the double flower allele at one  
368 locus,  $D_{jo}$  or  $D_{su}$ . Contrarily, all single flowers have dominant single flower alleles on both  $D_{jo}$  and  $D_{su}$   
369 loci. This indicated that each locus independently controls flower phenotype.

370 Developed DNA markers J01 and S01 could successfully identify recessive double flower  
371 alleles for  $D_{jo}$  and  $D_{su}$ , respectively. Both markers showed high fitting ratio with phenotype and were  
372 applicable to the examined *H. macrophylla* accessions. The S01 marker is superior to the DNA marker  
373 STAB045 linked to  $D_{su}$  and which was discovered by Waki et al.<sup>5</sup> because the former has a wide range  
374 of applicability. While the S01 marker genotype completely fitted with the phenotype in all tested  
375 accessions, STAB045 did not (data not shown). Because both J01 and S01 showed a wide range of  
376 applicability, it is advantageous to use them in combination to reveal the existence of the double flower  
377 allele in *H. macrophylla* accessions. This information will help in selection of candidate parents with  
378 heterozygous recessive double flower alleles to obtain double flower progenies. In addition, these  
379 DNA markers should be useful in marker assisted selection (MAS) of double flower progenies. To  
380 obtain double flower progenies, at least the paternal parent should be of the single flower phenotype  
381 because very few or none at all pollen grains are produced in double flower individuals. In addition,  
382 it requires approximately 2 years to confirm the flower phenotype from the time of crossing.  
383 Identification of flower phenotype at the seedling stage by MAS would enable the discarding of single



384 flower individuals and allow the growth of double flower individuals. The developed DNA markers  
385 should accelerate the breeding of double flower phenotypes.

386 In the genomic sequence of ‘Kirakiraboshi,’ an insertion was detected in the second exon of  
387 the *LFY* gene. This insertion actually resulted in frameshift of cloned mRNA in both splice variants.  
388 Therefore, it was speculated that the function of the *LFY* gene was suppressed or lost in ‘Kirakiraboshi’.  
389 The *LFY* gene and its homologue *FLO* have been identified in many plants, such as *Arabidopsis*  
390 *thaliana* and *Antirrhinum majus*, and are known as transcription factors for major flowering signals<sup>29-</sup>  
391 <sup>31</sup>. Additionally, many types of phenotypes in *Arabidopsis lfy* mutants have been reported<sup>32,33</sup>. In the  
392 *lfy* strong phenotype, most organs are sepal-like, or mosaic sepal/carpels organs, and the sepal-like  
393 organs are characteristic of wild-type cauline leaves<sup>33</sup>. Therefore, the flowers of the *lfy* mutant  
394 appeared to be double flowers that are formed from leaves or sepals. Additionally, a similar phenotype  
395 has been reported in *LFY* homologue mutants or transgenic plants such as the *flo* mutant of  
396 *Antirrhinum majus*<sup>34</sup>, *uni* mutant of pea<sup>35</sup>, and co-suppressed *NFL* transgenic plant of tobacco<sup>37</sup>.  
397 Therefore, generally, when the *LFY* gene function is lost, petal, stamens, and a carpel are likely to be  
398 replaced by sepal-like organs. In decorative flowers of hydrangea, sepals show petaloid characteristics  
399 including pigmentation and enlarged organ size. It is possible that sepal-like organs in decorative  
400 flowers show petaloid characteristics and form double flowers. Therefore, we assumed that *LFY* is a  
401 causative gene of the double flower phenotype of ‘Sumidanohanabi’.

402 However, there remain several unexplained observations in this study. The double flower of  
403 ‘Kirakiraboshi’ did not exhibit the exact same phenotype of the *lfy* mutant. Generally, the flowers of  
404 *lfy* or its orthologous gene mutants have only leaf-like or sepal-like organs that have chlorophyll,  
405 stomata, and trichome, and these organs have almost no petal identity<sup>33,34</sup>. When flowering signals in  
406 *lfy* mutant were lost completely, floral organs were not fully formed<sup>33-35</sup>. In the double flowers of  
407 ‘Kirakiraboshi’, the floral organs keep their petal identity, have papilla cells, and are pink or blue.

408 These phenotypes of ‘Kirakiraboshi’ might reflect partial remaining of LFY function. Additionally, it  
409 has been reported that *lfy* mutants with an intermediate or weak phenotype sometimes develop petaloid  
410 organs<sup>33</sup>. According to the genomic sequence of *H. macrophylla*, no other *LFY* gene was observed. It  
411 could be considered that the double flowers of ‘Kirakiraboshi’ were induced via partial repression of  
412 the LFY function.

413 On the contrary, we could not find any candidate gene that controls the double flower  
414 phenotype for the *D<sub>jo</sub>* locus. One possible reason was that SNPs were not called in scaffold with  
415 causative gene. In pseudomolecules, about half of the total scaffolds length was not included since  
416 relevant SNPs were not called. Improvement of SNP density would be effective for discovering  
417 additional scaffolds that are tightly linked to *D<sub>jo</sub>*. Although candidate gene for *D<sub>jo</sub>* could not be  
418 identified from the linkage information, we predicted several candidate genes. In hydrangea, stamens  
419 and petals were absent from decorative flowers of the double flower plant, and there was an increased  
420 number of sepals<sup>4</sup>. Since causative genes should explain the changes in formation, the B-class genes  
421 of the ABC model, *PI* and *AP3*, were predicted as candidate genes. In *A. thaliana*, the B-class gene *pi*  
422 or *ap3* mutants showed an increase in the number of sepals converted from petals<sup>37</sup>. If these genes  
423 were mutated in hydrangea, an increase in sepals would be expected. In hydrangea, *HmPI*, *HmAP3*,  
424 and *HmTM6* were identified as B-class genes<sup>38,39</sup>. As *HmAP3* was located on CHR13, it was not  
425 considered as a causative gene for *D<sub>jo</sub>*. In this study, *HmPI* and *HmTM6* were not included in the  
426 pseudomolecule. Ascertaining the loci of these genes might reveal the causative gene for *D<sub>jo</sub>*.

427 In this study, we report DNA markers and possible causative genes for the double flower  
428 phenotype observed in two hydrangea cultivars. For this analysis, we established a reference sequence  
429 for the hydrangea genome using advanced sequencing technologies including the long-read  
430 technology (PacBio) and the HiC method<sup>9</sup>, bioinformatics techniques for the diploid genome  
431 assembly<sup>14</sup>, and haplotype phasing<sup>8</sup>. To the best of our knowledge, this is the first report on the

432 chromosome-level haplotype-phased sequences in hydrangea at the level of the species (*H.*  
433 *macrophylla*), genus (*Hydrangea*), family (Hydrangeaceae), and order (Cornales). The genomic  
434 information from this study based on NGS technology is a significant contribution to the genetics and  
435 breeding of hydrangea and its relatives. It will serve to accelerate the knowledge base of the evolution  
436 of floral characteristics in Hydrangeaceae.

437

438 **Acknowledgments:** We thank Ohama A, Ono M, Seki A and Kitagawa A (Nihon University) and  
439 Sasamoto S, Watanabe A, Nakayama S, Fujishiro T, Kishida Y, Kohara M, Tsuruoka H, Minami C,  
440 and Yamada M (Kazusa DNA Research Institute) for their technical help.

441

442 **Funding:** This study was partially supported by the Nihon University College of Bioresource Sciences  
443 Research Grant for 2018, and by the JSPS KAKENHI Grant, Number JP18K14461.

444

445 **Supporting information:**

446 **Supplementary Table S1.** RNA samples used for Iso-Seq and RNA-Seq

447 **Supplementary Table S2.** Statistics of the genome sequences of *Hydrangea macrophylla*  
448 ‘Aogashima-1’

449 **Supplementary Table S3.** J01 marker genotypes and double flower phenotypes of 15IJP1 population.

450 **Supplementary Table S4.** J01 marker genotypes and double flower phenotypes of 14GT77  
451 population.

452 **Supplementary Figure S1.** Alignment of *LFY* genomic sequence and CDS.

453

454 **Data availability:**

455 The sequence reads are available from the DNA Data Bank of Japan (DDBJ) Sequence Read Archive

456 (DRA) under the accession numbers DRA010300, DRA010301, and DRA010302. The assembled  
457 sequences are available from the BioProject accession number PRJDB10054. The genome information  
458 is available at Plant GARDEN (<https://plantgarden.jp>).

459

## 460 **References**

461 1. Uemachi, T., Kato, Y., and Nishio, T. 2004, Comparison of decorative and non-decorative flowers  
462 in *Hydrangea macrophylla* (Thunb.) Ser., *Sci. Hortic.*, 102, 325–334

463

464 2. Uemachi, T., Kurokawa, M., and Nishio, T. 2006, Comparison of inflorescence composition and  
465 development in the lacecap and its sport, hortensia *Hydrangea macrophylla* (Thunb.) Ser., *J. Japan.*  
466 *Soc. Hort. Sci.*, 75, 154–160.

467

468 3. Uemachi, T. and Okumura, A. 2012, The inheritance of inflorescence types in *Hydrangea*  
469 *macrophylla*, *J. Japan. Soc. Hort. Sci.*, 81, 263–268.

470

471 4. Suyama, T., Tanigawa, T., Yamada, A. et al. 2015, Inheritance of the double-flowered trait in  
472 decorative hydrangea flowers, *Hortic. J.*, 84, 253-260.

473

474 5. Waki, T., Kodama, M., Akutsu, M. et al. 2018, Development of DNA markers linked to double-  
475 flower and hortensia traits in *Hydrangea macrophylla* (Thunb.) Ser., *Hortic J.*, 87, 264-273.

476

477 6. Heijmans, K., Ament, K., Rijpkema, A.S. et al. 2012, Redefining C and D in the petunia ABC, *Plant*  
478 *Cell*, 24, 2305-2317.

479

- 480 7. Tränkner, C., Krüger, J., Wanke, S., Naumann, J., Wenke, T. and Engel, F. 2019, Rapid identification  
481 of inflorescence type markers by genotyping-by-sequencing of diploid and triploid F1 plants of  
482 *Hydrangea macrophylla*, *BMC Genet.*, 20, 60.
- 483
- 484 8. Kronenberg, Z. N., Hall, R. J., Hiendleder, S., et al. 2018, FALCON-Phase: Integrating PacBio  
485 and Hi-C data for phased diploid genomes, *BioRxiv*, 327064.
- 486
- 487 9. Dudchenko, O., Batra, S. S., Omer, A. D., et al. 2017, De novo assembly of the *Aedes aegypti*  
488 genome using Hi-C yields chromosome-length scaffolds. *Science*, 356, 92-95.
- 489
- 490 10. Mascher, M. and Stein, N. 2014, Genetic anchoring of whole-genome shotgun assemblies,  
491 *Front Genet*, 5, 208.
- 492
- 493 11. Marçais, G. and Kingsford, C. 2011, A fast, lock-free approach for efficient parallel counting  
494 of occurrences of k-mers, *Bioinformatics*, 27, 764-770.
- 495
- 496 12. Kajitani, R., Toshimoto, K., Noguchi, H., et al. 2014, Efficient de novo assembly of highly  
497 heterozygous genomes from whole-genome shotgun short reads, *Genome Res*, 24, 1384-1395.
- 498
- 499 13. Simao, F. A., Waterhouse, R. M., Ioannidis, P., Kriventseva, E. V., and Zdobnov, E. M. 2015,  
500 BUSCO: assessing genome assembly and annotation completeness with single-copy orthologs,  
501 *Bioinformatics*, 31, 3210-3212.
- 502
- 503 14. Chin, C. S., Peluso, P., Sedlazeck, F. J., et al. 2016, Phased diploid genome assembly with

504 single-molecule real-time sequencing, *Nat Methods*, 13, 1050-1054.

505

506 15. Walker, B. J., Abeel, T., Shea, T., et al. 2014, Pilon: an integrated tool for comprehensive  
507 microbial variant detection and genome assembly improvement, *PLoS One*, 9, e112963.

508

509 16. Shirasawa, K., Hirakawa, H., and Isobe, S. 2016, Analytical workflow of double-digest  
510 restriction site-associated DNA sequencing based on empirical and in silico optimization in  
511 tomato, *DNA Res*, 23, 145-153.

512

513 17. Rastas, P. 2017, Lep-MAP3: robust linkage mapping even for low-coverage whole genome  
514 sequencing data, *Bioinformatics*, 33, 3726-3732.

515

516 18. Tang, H., Zhang, X., Miao, C., et al. 2015, ALLMAPS: robust scaffold ordering based on  
517 multiple maps, *Genome Biol*, 16, 3.

518

519 19. Grabherr, M. G., Haas, B. J., Yassour, M., et al. 2011, Full-length transcriptome assembly  
520 from RNA-Seq data without a reference genome, *Nat Biotechnol*, 29, 644-652.

521

522 20. Stanke, M., Keller, O., Gunduz, I., Hayes, A., Waack, S., and Morgenstern, B. 2006,  
523 AUGUSTUS: ab initio prediction of alternative transcripts, *Nucleic Acids Res*, 34, W435-439.

524

525 21. Kent, W. J., 2002, BLAT - the BLAST-like alignment tool, *Genome Res*, 12, 656-664.

526

527 22. Ghelfi, A., Shirasawa, K., Hirakawa, H., and Isobe, S. 2019, Hayai-Annotation Plants: an

- 528 ultra-fast and comprehensive functional gene annotation system in plants, *Bioinformatics*, 35,  
529 4427-4429.
- 530
- 531 23. Bolger, A.M., Lohse, M., and Usadel, B. 2014, Trimmomatic: a flexible trimmer for Illumina  
532 sequence data, *Bioinformatics*, 30, 2114-2120.
- 533
- 534 24. Li, H., Handsaker, B., Wysoker, A., et al. 2009, The Sequence Alignment/Map format and  
535 SAMtools, *Bioinformatics*, 25, 2078-2079.
- 536
- 537 25. Untergasser, A., Cutcutache, I., Koressaar, T. et al. 2012, Primer3--new capabilities and interfaces.  
538 *Nucleic Acids Res.*, 40, e115.
- 539
- 540 26. Schmieder, R. and Edwards, R. 2011, Quality control and preprocessing of metagenomic  
541 datasets, *Bioinformatics*, 27, 863-864.
- 542
- 543 27. Langmead, B. and Salzberg, S. L. 2012, Fast gapped-read alignment with Bowtie 2, *Nat*  
544 *Methods*, 9, 357-359.
- 545
- 546 28. Danecek, P., Auton, A., Abecasis, G., et al. 2011, The variant call format and VCFtools,  
547 *Bioinformatics*, 27, 2156-2158.
- 548
- 549 29. Jaeger, K.E., Pullen, N., Lamzin, S., Morris, R.J., and Wigge, P.A. 2013, Interlocking feedback  
550 loops govern the dynamic behavior of the floral transition in Arabidopsis, *Plant Cell*, 25, 820–  
551 833.

552

553 30. Krizek, B.A. and Fletcher, J.C. 2005, Molecular mechanisms of flower development: an  
554 armchair guide, *Nat. Rev. Genet.*, 6, 688.

555

556 31. William, D.A., Su, Y., Smith, M.R., Lu, M., Baldwin, D.A., and Wagner, D. 2004, Genomic  
557 identification of direct target genes of LEAFY, *Proc. Nat. Acad. Sci.*, 101, 1775–1780.

558

559 32. Okamuro, J.K., Den Boer, B.G., and Jofuku, K.D. 1993, Regulation of Arabidopsis flower  
560 development, *Plant Cell*, 5, 1183-1193.

561

562 33. Weigel, D., Alvarez, J., Smyth, D.R., Yanofsky, M.F., and Meyerowitz, E.M. 1992, LEAFY  
563 controls floral meristem identity in Arabidopsis, *Cell*, 69, 843-859.

564

565 34. Carpenter, R. and Coen, E.S. 1990, Floral homeotic mutations produced by transposon-  
566 mutagenesis in *Antirrhinum majus*, *Gene. Dev.*, 4, 1483–1493.

567

568 35. Hofer, J., Turner, L., Hellens, R. et al. 1997, UNIFOLIATA regulates leaf and flower  
569 morphogenesis in pea, *Curr. Biol.*, 7, 581–587.

570

571 36. Ahearn, K.P., Johnson, H.A., Weigel, D., and Wagner, D.R. 2001, NFL1, a *Nicotiana tabacum*  
572 LEAFY-like gene, controls meristem initiation and floral structure, *Plant Cell Physiol.*, 42, 1130–  
573 1139.

574

575 37. Bowman, J.L., Smyth, D.R., and Meyerowitz, E.M. 1989, Genes directing flower development in



576 Arabidopsis, *Plant Cell*, 1, 37-52.

577

578 38. Kitamura, Y., Hosokawa, M., Uemachi, T., and Yazawa, S. 2009, Selection of ABC genes for  
579 candidate genes of morphological changes in hydrangea floral organs induced by phytoplasma  
580 infection, *Sci. Hort.*, 122, 603-609.

581

582 39. Kramer, E.M. and Irish, V.F. 2000. Evolution of the petal and stamen development programs:  
583 Evidence from comparative studies of the lower eudicots and basal angiosperms, *Int. J. Plant Sci.*, 161,  
584 s29-s40

585

586

587

588

589

590

591

592

593

594

595

596

597

598

599

Table 1. SNPs correlated (fitting rate more than 95%) with double flower phenotype in 12GM1 population

| Scaffold | Position at Phase 0 | Sequence variant   |                       | Fitting rate (%) | Frequency of double flower phenotype (double flower/all) |              |                                       |
|----------|---------------------|--------------------|-----------------------|------------------|----------------------------------------------------------|--------------|---------------------------------------|
|          |                     | Posy Bouquet Grace | Blue Picotee manasulu |                  | Homozygous of 'Posy Bouquet Grace'                       | Heterozygous | Homozygous of 'Blue Picotee Manasulu' |
| 0008F-2  | 3250598             | A                  | G                     | 100              | 37/37                                                    | 0/61         | 0/47                                  |
| 0008F-2  | 3250523             | A                  | C                     | 100              | 37/37                                                    | 0/61         | 0/47                                  |
| 0008F-2  | 780104              | C                  | A                     | 100              | 37/37                                                    | 0/60         | 0/48                                  |
| 0259F    | 404610              | T                  | A                     | 100              | 37/37                                                    | 0/60         | 0/48                                  |
| 1207F    | 365533              | C                  | T                     | 100              | 38/38                                                    | 0/61         | 0/48                                  |
| 1207F    | 372121              | C                  | A                     | 100              | 38/38                                                    | 0/61         | 0/47                                  |
| 0012F    | 1318350             | T                  | C                     | 97.9             | 37/39                                                    | 1/59         | 0/48                                  |
| 0437F    | 170787              | G                  | A                     | 97.9             | 36/37                                                    | 1/60         | 1/49                                  |
| 0437F    | 180821              | A                  | G                     | 97.9             | 36/37                                                    | 1/60         | 1/49                                  |
| 0994F    | 216439              | C                  | T                     | 97.9             | 36/37                                                    | 1/60         | 1/49                                  |

600

601

602

603

604

605

606

607

608

609

610

611

612

613

614

615

616

Table 2. SNPs correlated (fitting rate more than 95%) with double flower phenotype in KF population

| Scaffold | Position at Phase 0 | Sequence variant |              | Fitting rate (%) | Frequency of double flower phenotype (double flower/all) |              |                              |
|----------|---------------------|------------------|--------------|------------------|----------------------------------------------------------|--------------|------------------------------|
|          |                     | Kirakiraboshi    | Frau Yoshimi |                  | Homozygous of 'Kirakiraboshi'                            | Heterozygous | Homozygous of 'Frau Yoshimi' |
| 0577F    | 1204837             | AG               | AAACATG      | 98.9             | 22/22                                                    | 0/51         | 1/20                         |
| 3145F    | 55089               | TA               | TAA          | 98.9             | 22/22                                                    | 0/51         | 1/20                         |
| 3145F    | 55109               | G                | A            | 98.9             | 22/22                                                    | 0/51         | 1/20                         |
| 3145F    | 55446               | G                | A            | 98.9             | 22/22                                                    | 0/51         | 1/20                         |
| 0109F    | 868569              | C                | G            | 95.7             | 22/25                                                    | 0/44         | 1/24                         |

617

618

619

620

621

622

623

624

625

626

627

628

629

630

631

632

633

634

Table 3. Genotypes of DNA marker J01 and S01 in *H. macrophylla* varieties

| Accession name       | Phenotype | Genotype      |         |
|----------------------|-----------|---------------|---------|
|                      |           | J01           | S01     |
| Jogasaki             | Double    | 117_50/117_50 | 250/280 |
| Posy Bouquet Grace   | Double    | 117_50/117_50 | 280/280 |
| Izunohana            | Double    | 117_50/117_50 | 250/280 |
| Chikushinokaze       | Double    | 117_50/117_50 | 250/280 |
| Chikushinomai        | Double    | 117_50/117_50 | 280/280 |
| Chikushiruby         | Double    | 117_50/117_50 | 280/280 |
| Corsage              | Double    | 117_50/117_50 | 280/280 |
| Dance Party          | Double    | 117_50/117_50 | 280/280 |
| Fairy Eye            | Double    | 117_50/117_50 | 250/280 |
| Posy Bouquet Casey   | Double    | 117_50/117_50 | 250/280 |
| Sumidanohanabi       | Double    | 167/167       | 236/236 |
| Kirakiraboshi        | Double    | 167/167       | 236/236 |
| HK01                 | Double    | 167/167       | 236/236 |
| HK02                 | Double    | 167/167       | 236/236 |
| 03JP1                | Single    | 117_50/167    | 280/280 |
| Amethyst             | Single    | 167/167       | 250/280 |
| Blue Picotee Manaslu | Single    | 167/167       | 280/280 |
| Blue Sky             | Single    | 167/167       | 280/280 |
| Bodensee             | Single    | 167/167       | 250/250 |
| Chibori              | Single    | 167/167       | 280/280 |
| Furau Mariko         | Single    | 167/167       | 250/250 |
| Furau Yoshiko        | Single    | 167/167       | 280/280 |
| Furau Yoshimi        | Single    | 167/167       | 250/280 |
| Green Shadow         | Single    | 167/167       | 280/280 |
| Kanuma Blue          | Single    | 167/167       | 250/280 |
| Mrs. Kumiko          | Single    | 167/167       | 280/280 |
| Paris                | Single    | 167/167       | 280/280 |
| Peach Hime           | Single    | 167/167       | 280/280 |
| Picotee              | Single    | 167/167       | 282/282 |
| Ruby Red             | Single    | 167/167       | 280/280 |
| Shinkai              | Single    | 167/167       | 280/280 |
| Tokimeki             | Single    | 167/167       | 280/282 |
| Uzuajisai            | Single    | 167/167       | 250/280 |

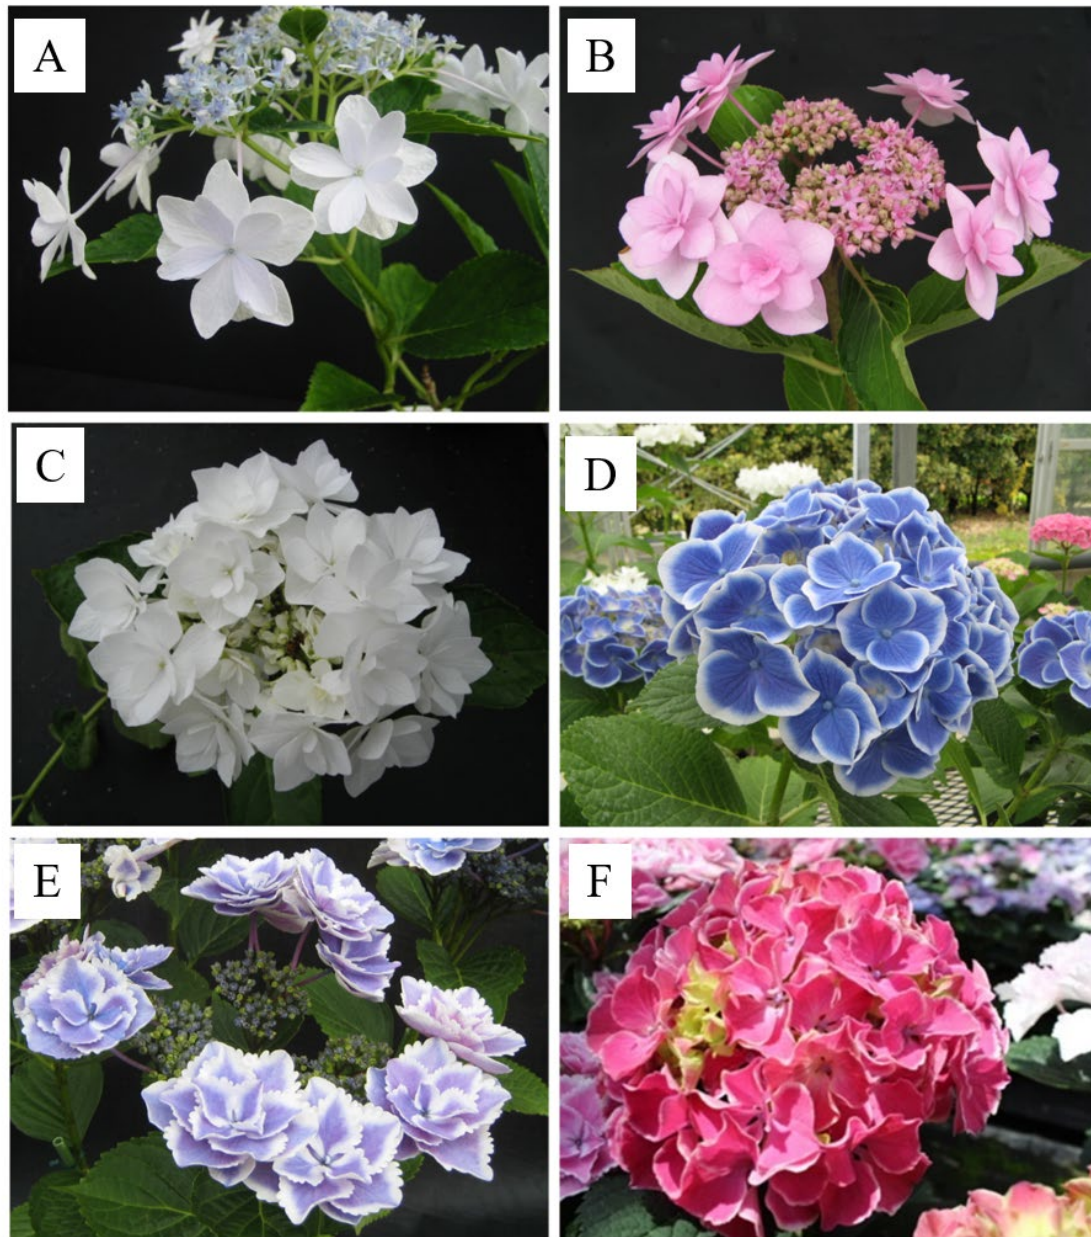

636

637 Figure 1. Flower phenotypes of hydrangea accessions

638 A: 'Sumidanohanabi' (double flower). B: 'Jogasaki' (double flower). C: 'Posy Bouquet Grace' (double

639 flower). D: 'Blue Picotee Manaslu' (single flower). E: 'Kirakiraboshi' (double flower). F: 'Frau

640 Yoshimi' (single flower).

641

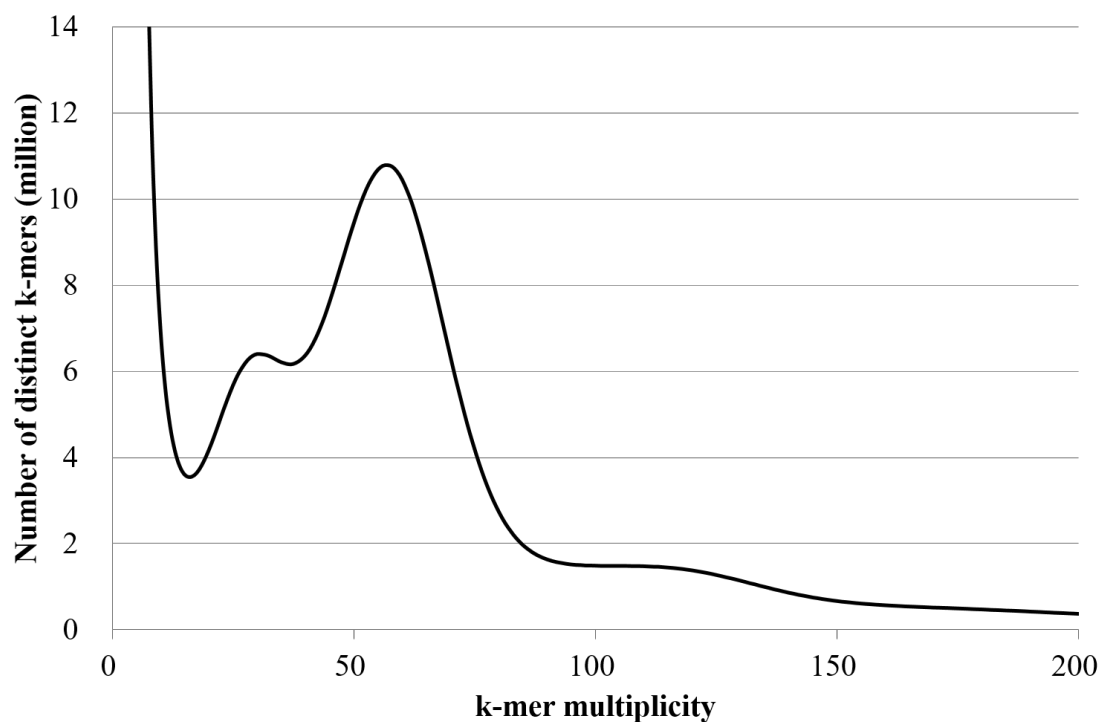

642

643 Figure 2. Genome size estimation for the hydrangea line 'Aogashima-1' with the distribution of the  
644 number of distinct  $k$ -mers ( $k=17$ ), with the given multiplicity values.

645

646

647

648

649

650

651

652

653

654

655

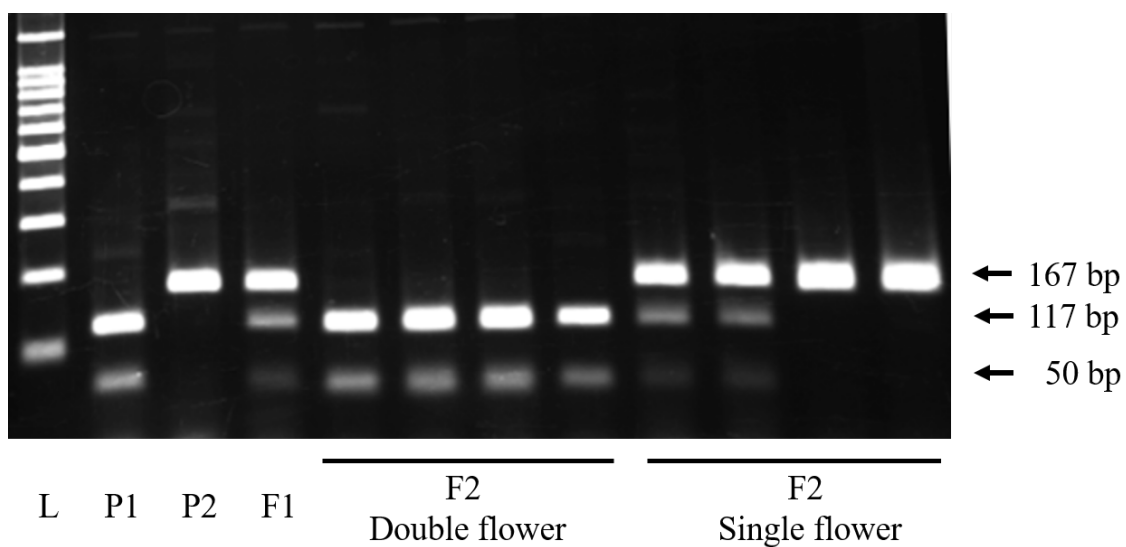

656

657 Figure 3. Fragment pattern of J01 DNA marker

658 Dominant single flower allele is shown as undigested 167 bp fragment. Recessive double flower allele

659 is shown as digested 117 and 50 bp fragments. L: 100 bp ladder, P1: 'Posy Bouquet Grace'

660 (117\_50/117\_50), P2: 'Blue Picotee Manaslu' (167/167).

661

662

663

664

665

666

667

668

669

670

671

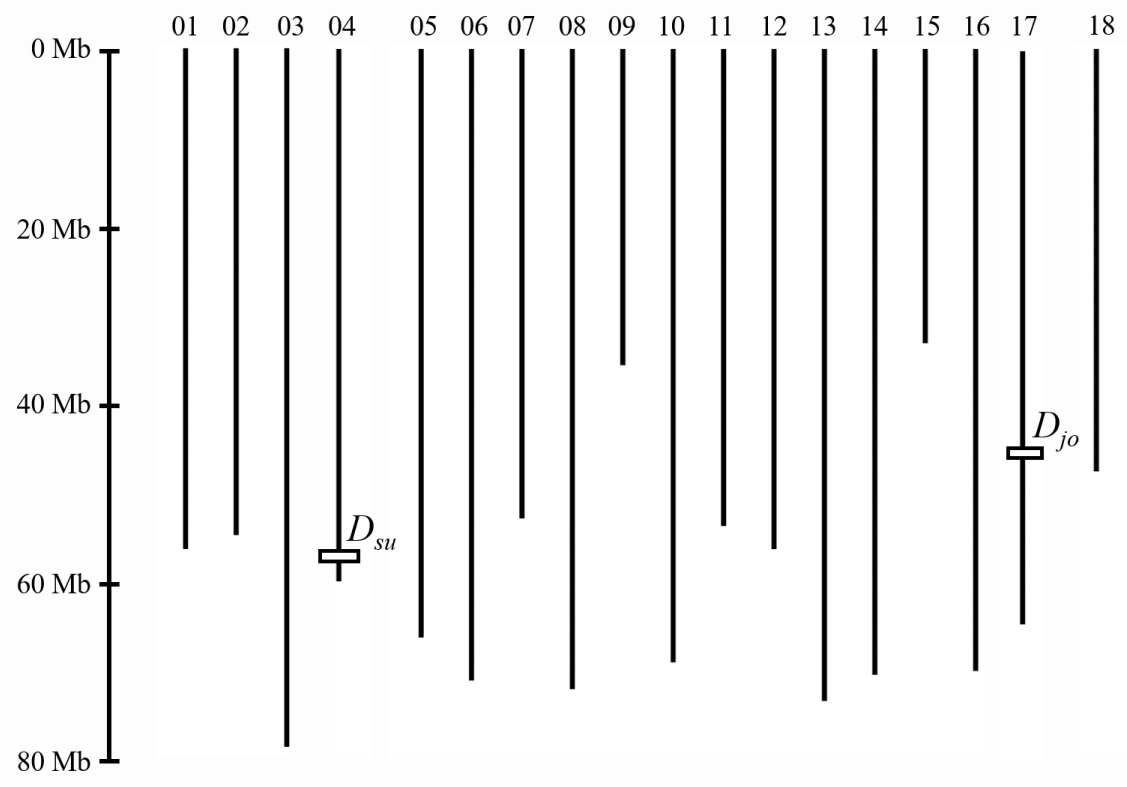

672

673 Figure 4. Schematic model of pseudomolecules

674 Double flower phenotype controlling loci  $D_{su}$  and  $D_{jo}$  are shown.  $D_{jo}$  is shown as J01 marker position

675 46,326,384 in CHR17.  $D_{su}$  is shown as tightly linked SNP at 0109F\_868569, since the S01 marker

676 sequence was not on the pseudomolecule.

677

678

679

680

681

682

683

684

685



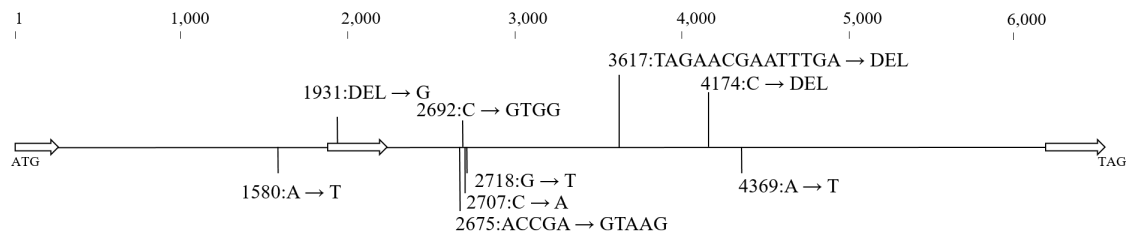

686

687 Figure 5. DNA polymorphisms in *LFY* genomic sequence

688 *LFY* sequence polymorphisms observed specifically in ‘Kirakiraboshi’ genomic sequence

689 The sequence is started from the initiation codon (ATG) at 678,200 to the termination signal (TAG) at

690 684,639 in phase 1 sequence of 0577F of HMA\_r1.2. White arrows indicate coding sequences, CDS1:

691 1 to 454 bp, CDS2: 1,888 to 2,255 bp, CDS3: 6,078 to 6,440 bp. Genetic variants are shown as from

692 Hma1.2 sequence to ‘Kirakiraboshi’.

693

694

695

696

697

698

699

700

701

702

703

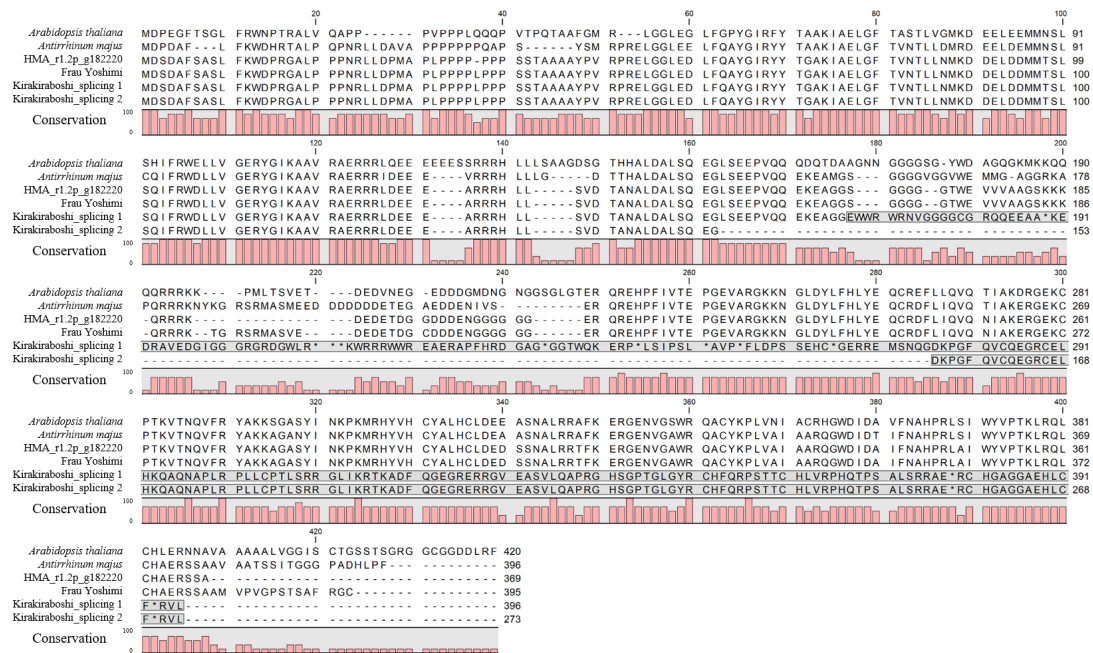

704

705 Figure 6. Alignment of LFY protein sequences

706 Amino acids with gray background show frameshifted regions. Splicing variant was observed, and

707 both sequences showed frameshift in 'Kirakiraboshi'. *Arabidopsis thaliana*: ABE66271.1 *Antirrhinum*

708 *majus*: AAA62574.1.

709

710

711

712

713

714

715

716

717

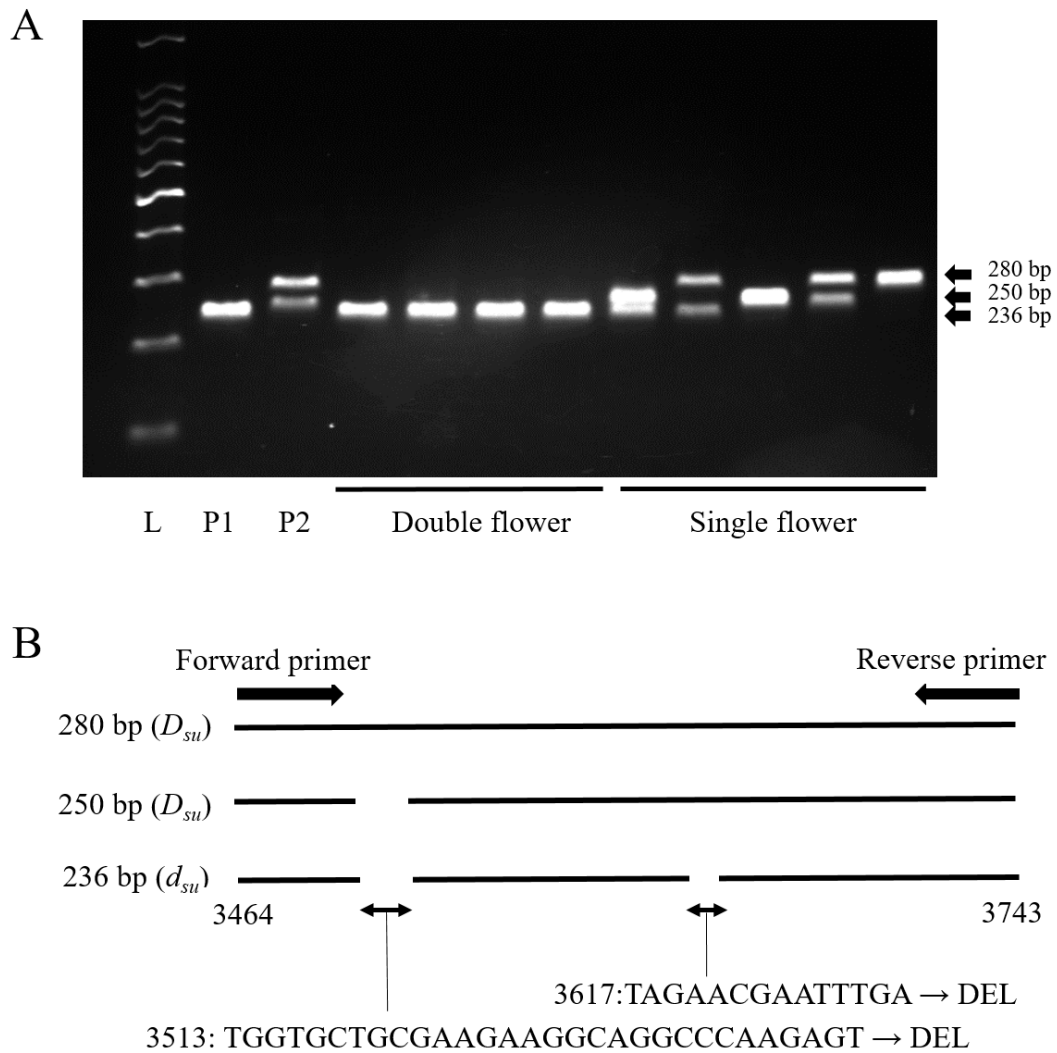

718

719 Figure 7. Fragment pattern of S01 DNA marker

720 A. Fragment pattern of S01 DNA marker. Dominant single flower alleles are shown as 250 bp and 280

721 bp fragments. Recessive double flower allele is shown as 236 bp fragments. L: 100 bp ladder, P1:

722 ‘Kirakiraboshi’ (236/236), P2: ‘Frau Yoshimi’ (250/280).

723 B. INDEL polymorphisms in alleles of DNA marker S01 amplified sequences. Position on schematic

724 models were the same as in Figure 5.
